# Supplementary material for: Synthesis of α-Fe2−xAgxO3nanocrystals and study of their optical, magnetic and antibacterial properties
Source: Royal Society of Chemistry journal article supplement (doi:10.1039/c4ra17259k), 2015-01-01
Supplement: c4ra17259k1.pdf [file c4ra17259k1.pdf]

### Supplementary Information

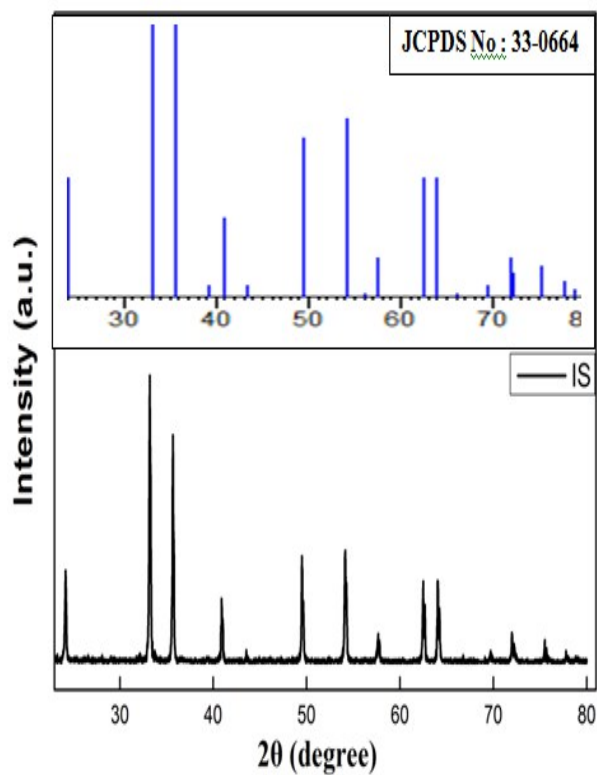

Fig. 1. XRD patterns for sample IS and the JCPDS data for  $\alpha\text{-Fe}_2\text{O}_3$ .

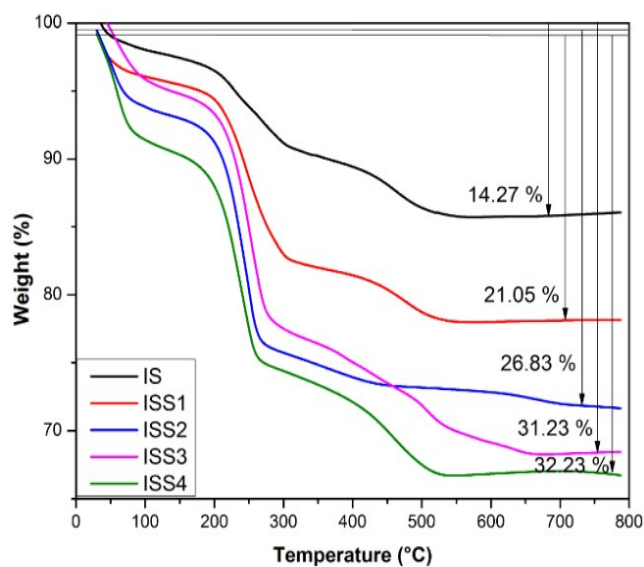

Fig. 2. TGA curve for all the samples.

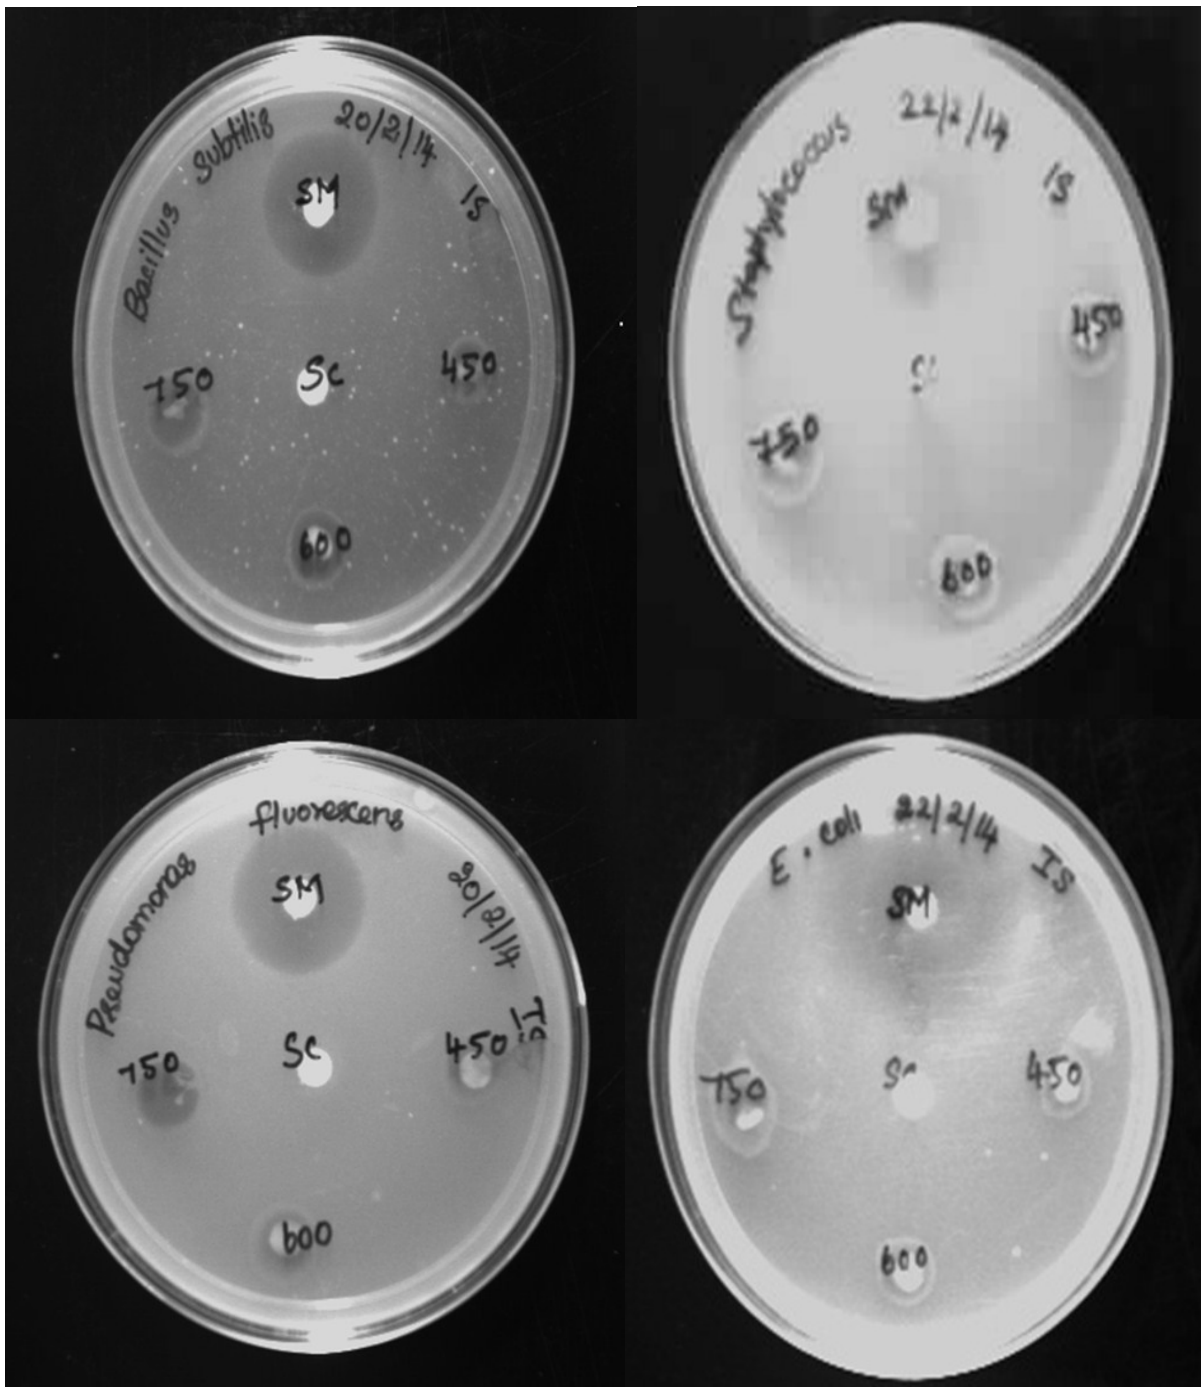

Fig. 8E: Zone inhibition of sample IS against bacteria *B. subtilis*, *S. aureus*, *P. fluorescens* and *E. coli*.

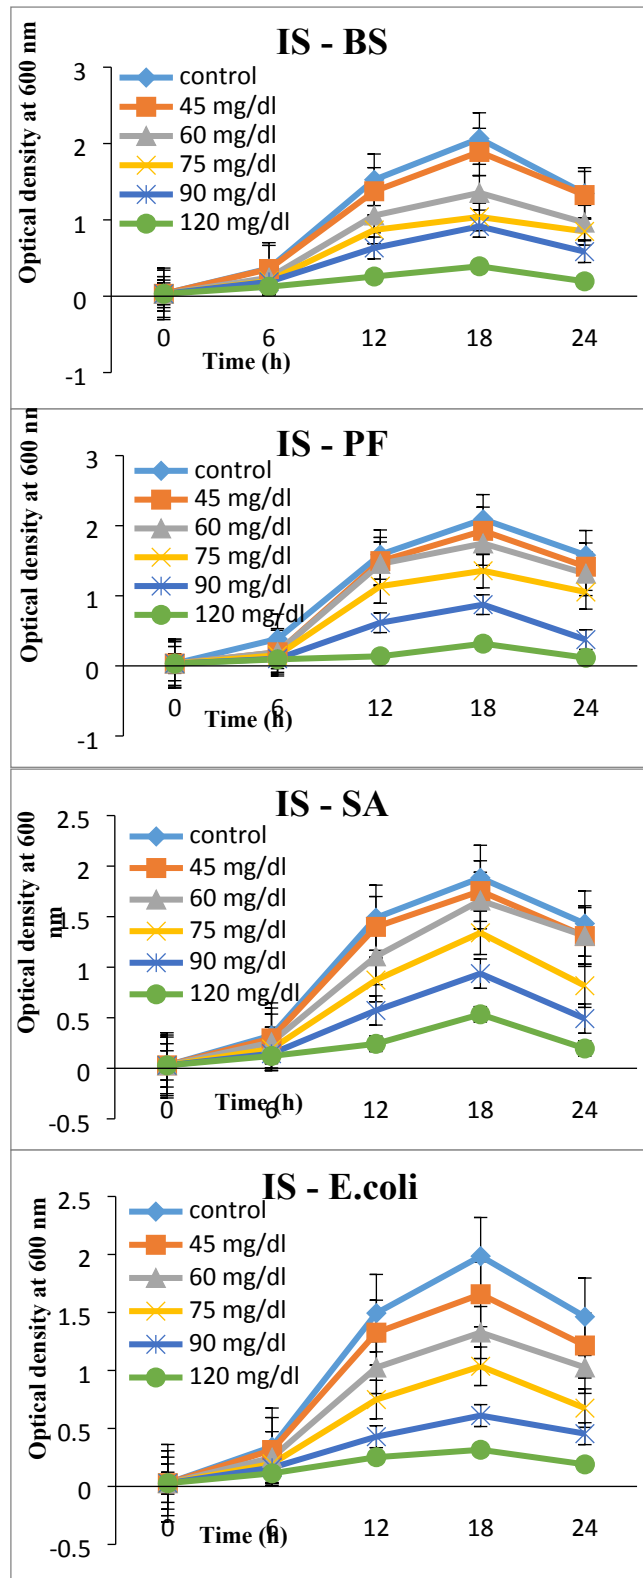

Fig. 9E: Growth curves of bacteria *B. subtilis* (BS), *P. fluorescens* (PF), *S. aureus* (SA) and *E. coli* for the sample IS.
